# Supplementary material for: Pronounced non-Arrhenius behaviour of hydrogen-abstractions from toluene and derivatives by phthalimide-N-oxyl radicals: a theoretical study
Source: Royal Society of Chemistry journal article supplement (doi:10.1039/b716932a), 2008-01-01
Supplement: b716932a.pdf [file b716932a.pdf]

# Hydrogen-abstractions from toluene and derivatives by phthalimide-*N*-oxyl radicals: a theoretical study

*Ive Hermans<sup>a,b\*</sup>, Pierre A. Jacobs<sup>a</sup>, Jozef Peeters<sup>c</sup>*

a) Centre for Surface Chemistry and Catalysis, Department of Microbial and Molecular Systems (M<sup>2</sup>S), K.U.Leuven, Kasteelpark Arenberg 23, B-3001 Heverlee, Belgium.

b) current address: Institute for Chemical and Bioengineering, Department of Chemistry and Applied Biosciences, Swiss Federal Institute of Technology (ETH Zürich), Hönggerberg, HCI, Wolfgang-Pauli-Str. 10, CH-8093 Zürich

c) Division for Quantum Chemistry and Physical Chemistry, Department of Chemistry, K.U.Leuven, Celestijnenlaan 200F, B-3001 Heverlee, Belgium.

\*) [ive.hermans@chem.ethz.ch](mailto:ive.hermans@chem.ethz.ch)

## SUPPORTING INFORMATION

## Contents:

UB3LYP/6-31G(d,p) optimized geometries, vibration frequencies and rotational constants for the TSs of PINO<sup>•</sup> + ...reaction (see Table 1).

|                                                                                 |        |
|---------------------------------------------------------------------------------|--------|
| <i>p</i> -(CH <sub>3</sub> -C <sub>6</sub> H <sub>4</sub> -CH <sub>3</sub> )    | S.I.3  |
| <i>p</i> -(H-C <sub>6</sub> H <sub>4</sub> -CH <sub>3</sub> )                   | S.I.4  |
| <i>p</i> -(C(O)OH-C <sub>6</sub> H <sub>4</sub> -CH <sub>3</sub> )              | S.I.6  |
| <i>p</i> -(NO <sub>2</sub> -C <sub>6</sub> H <sub>4</sub> -CH <sub>3</sub> )    | S.I.8  |
| <i>p</i> -(CH <sub>3</sub> -C <sub>6</sub> H <sub>4</sub> -CHO)                 | S.I.9  |
| <i>p</i> -(H-C <sub>6</sub> H <sub>4</sub> -CHO)                                | S.I.11 |
| <i>p</i> -(C(O)OH-C <sub>6</sub> H <sub>4</sub> -CHO)                           | S.I.12 |
| <i>p</i> -(NO <sub>2</sub> -C <sub>6</sub> H <sub>4</sub> -CHO)                 | S.I.14 |
| <i>p</i> -(CH <sub>3</sub> O-C <sub>6</sub> H <sub>4</sub> -CH <sub>2</sub> OH) | S.I.16 |
| <i>p</i> -(CH <sub>3</sub> -C <sub>6</sub> H <sub>4</sub> -CH <sub>2</sub> OH)  | S.I.17 |
| <i>p</i> -(H-C <sub>6</sub> H <sub>4</sub> -CH <sub>2</sub> OH)                 | S.I.19 |
| <i>p</i> -(NO <sub>2</sub> -C <sub>6</sub> H <sub>4</sub> -CH <sub>2</sub> OH)  | S.I.21 |

*p*-(CH<sub>3</sub>-C<sub>6</sub>H<sub>4</sub>-CH<sub>3</sub>)

E(UB+HF-LYP/6-31G(d,p)) (Hartree): -898.480581356

Electronic state : 2-A

Cartesian coordinates (Angs):

|   |           |           |           |
|---|-----------|-----------|-----------|
| C | 2.579258  | -2.156950 | -0.002781 |
| C | 2.470999  | -0.709666 | -0.003062 |
| C | 2.397823  | 0.020755  | 1.207721  |
| C | 2.273510  | 1.402850  | 1.202059  |
| C | 2.388576  | 0.019535  | -1.213523 |
| C | 2.204977  | 2.123438  | -0.003278 |
| C | 2.264139  | 1.402126  | -1.207987 |
| H | 2.963917  | -2.614868 | 0.908972  |
| H | 2.957636  | -2.615659 | -0.916758 |
| H | 2.440163  | -0.516056 | 2.151338  |
| H | 2.230562  | 1.939939  | 2.146353  |
| H | 2.423566  | -0.517904 | -2.157083 |
| H | 2.213673  | 1.938461  | -2.152261 |
| H | 1.310338  | -2.627353 | 0.001540  |
| O | 0.163504  | -2.988136 | 0.004793  |
| N | -0.590254 | -1.891055 | 0.003475  |
| C | -1.033169 | -1.249167 | 1.187907  |
| C | -1.036810 | -1.254600 | -1.182508 |
| O | -0.746898 | -1.574193 | 2.318310  |
| O | -0.753815 | -1.584715 | -2.312270 |
| C | -1.890995 | -0.131607 | -0.698407 |
| C | -2.608407 | 0.809314  | -1.422446 |
| C | -1.888774 | -0.128354 | 0.701262  |
| C | -3.335399 | 1.765964  | -0.700965 |
| C | -2.603857 | 0.815969  | 1.423177  |
| C | -3.333135 | 1.769256  | 0.699550  |
| H | -2.602695 | 0.796321  | -2.507547 |
| H | -3.910861 | 2.516696  | -1.234441 |
| H | -2.594702 | 0.808024  | 2.508304  |
| H | -3.906895 | 2.522484  | 1.231344  |
| C | 2.040602  | 3.622660  | -0.001728 |
| H | 0.981025  | 3.902832  | 0.061929  |
| H | 2.547205  | 4.080686  | 0.853313  |
| H | 2.440488  | 4.070978  | -0.915937 |

Rotational constants (GHz): 0.4218700 0.3216500 0.2527900

Vibrational harmonic frequencies (cm<sup>-1</sup>):

|            |          |          |
|------------|----------|----------|
| -1652.4665 | 14.6210  | 18.4279  |
| 27.7897    | 36.4717  | 54.7435  |
| 60.6097    | 98.5592  | 139.8416 |
| 149.7854   | 185.0599 | 238.4288 |
| 270.5570   | 293.4837 | 311.5879 |

|           |           |           |
|-----------|-----------|-----------|
| 335.2500  | 361.4803  | 386.8190  |
| 408.7630  | 414.0377  | 455.8436  |
| 463.5177  | 483.1956  | 517.9036  |
| 522.7712  | 523.6776  | 554.0995  |
| 603.9333  | 650.8902  | 677.0348  |
| 704.6461  | 716.5828  | 718.5458  |
| 723.9992  | 751.3125  | 784.8796  |
| 795.1294  | 827.5311  | 839.8835  |
| 849.8339  | 892.7330  | 910.3645  |
| 962.0911  | 969.2153  | 973.1650  |
| 989.6151  | 1006.9356 | 1015.4010 |
| 1025.7175 | 1029.6957 | 1047.0088 |
| 1059.5857 | 1083.9636 | 1094.9768 |
| 1132.1041 | 1150.0173 | 1170.3581 |
| 1184.4242 | 1192.6109 | 1205.6528 |
| 1232.9009 | 1241.5793 | 1280.0486 |
| 1311.8999 | 1342.7919 | 1351.6201 |
| 1388.8638 | 1401.3879 | 1424.9280 |
| 1459.7120 | 1480.8276 | 1499.1549 |
| 1501.9382 | 1502.3677 | 1506.2389 |
| 1514.5183 | 1547.7287 | 1591.9384 |
| 1644.5005 | 1655.8242 | 1661.7580 |
| 1820.7432 | 1860.4963 | 3036.0715 |
| 3097.3864 | 3107.6658 | 3128.3907 |
| 3179.4686 | 3179.9955 | 3192.0821 |
| 3193.6765 | 3198.7956 | 3200.9093 |
| 3205.3142 | 3217.6766 | 3220.8144 |

Zero-point correction (Hartree): 0.258456

*p*-(H-C<sub>6</sub>H<sub>4</sub>-CH<sub>3</sub>)

E(UB+HF-LYP/6-31G(d,p)) (Hartree): -859.159834465

Electronic state : 2-A

Cartesian coordinates (Angs):

|   |          |           |           |
|---|----------|-----------|-----------|
| C | 3.039815 | -1.335624 | -0.058557 |
| C | 2.653931 | 0.064423  | -0.083410 |
| C | 2.540904 | 0.809299  | 1.115695  |
| C | 2.147238 | 2.141723  | 1.092446  |
| C | 2.330361 | 0.709794  | -1.301711 |
| C | 1.845934 | 2.766199  | -0.123968 |
| C | 1.936772 | 2.042658  | -1.319057 |
| H | 3.577563 | -1.676343 | 0.826599  |
| H | 3.419580 | -1.752926 | -0.991391 |

|   |           |           |           |
|---|-----------|-----------|-----------|
| H | 2.763478  | 0.322899  | 2.061233  |
| H | 2.073036  | 2.698562  | 2.021988  |
| H | 2.389288  | 0.146089  | -2.228555 |
| H | 1.538784  | 3.807772  | -0.139903 |
| H | 1.699560  | 2.522961  | -2.263906 |
| H | 1.885491  | -2.039665 | 0.070709  |
| O | 0.843556  | -2.619258 | 0.168771  |
| N | -0.124067 | -1.706651 | 0.118457  |
| C | -0.659010 | -1.072746 | 1.269539  |
| C | -0.732718 | -1.284786 | -1.091402 |
| O | -0.276493 | -1.232502 | 2.406571  |
| O | -0.416741 | -1.644020 | -2.203344 |
| C | -1.792985 | -0.330673 | -0.656326 |
| C | -2.716756 | 0.371485  | -1.416663 |
| C | -1.748986 | -0.205065 | 0.737214  |
| C | -3.608973 | 1.212719  | -0.738342 |
| C | -2.627268 | 0.626688  | 1.416220  |
| C | -3.564773 | 1.338500  | 0.655791  |
| H | -2.741565 | 0.265838  | -2.496414 |
| H | -4.347373 | 1.776355  | -1.300785 |
| H | -2.583492 | 0.715651  | 2.496846  |
| H | -4.269387 | 1.998032  | 1.153576  |

Rotational constants (GHz): 0.5266200 0.3264200 0.2900500

Vibrational harmonic frequencies (cm<sup>-1</sup>):

|            |           |           |
|------------|-----------|-----------|
| -1668.5689 | 8.5263    | 20.3838   |
| 28.5154    | 59.3142   | 61.0391   |
| 116.1340   | 139.6517  | 167.0532  |
| 210.7028   | 239.0964  | 311.2477  |
| 325.1244   | 341.9674  | 348.9902  |
| 405.7063   | 413.8899  | 463.6559  |
| 468.9124   | 490.4477  | 514.8954  |
| 523.6751   | 543.3474  | 563.3175  |
| 603.8225   | 628.2935  | 676.8795  |
| 694.2209   | 704.6768  | 716.5957  |
| 719.9163   | 772.5592  | 784.8125  |
| 795.6318   | 829.5302  | 844.0928  |
| 892.4216   | 910.5176  | 918.2263  |
| 972.5521   | 973.7300  | 996.3186  |
| 998.6823   | 1007.4340 | 1007.9750 |
| 1016.2811  | 1046.9548 | 1049.1795 |
| 1085.2945  | 1094.7873 | 1120.3251 |
| 1131.8671  | 1159.1113 | 1184.9251 |
| 1185.0432  | 1192.8348 | 1204.2014 |
| 1233.1259  | 1274.2320 | 1312.0706 |
| 1351.1565  | 1364.2020 | 1388.8426 |
| 1401.7851  | 1479.0973 | 1490.0921 |

|           |           |           |
|-----------|-----------|-----------|
| 1502.6792 | 1506.6063 | 1509.9742 |
| 1532.3794 | 1609.4267 | 1634.6785 |
| 1655.7172 | 1661.9338 | 1821.5793 |
| 1861.0395 | 3109.1073 | 3184.0340 |
| 3189.3115 | 3192.8138 | 3196.2130 |
| 3197.4748 | 3204.3115 | 3205.8689 |
| 3212.5660 | 3217.8025 | 3221.0570 |

Zero-point correction (Hartree): 0.231021

*p*-(C(O)OH-C<sub>6</sub>H<sub>4</sub>-CH<sub>3</sub>)

E(UB+HF-LYP/6-31G(d,p)) (Hartree): -1047.73364279

Electronic state : 2-A

Cartesian coordinates (Angs):

|   |           |           |           |
|---|-----------|-----------|-----------|
| C | -0.122755 | -3.495825 | -0.085515 |
| C | -1.004639 | -2.344723 | -0.087451 |
| C | -1.322631 | -1.671946 | -1.294328 |
| C | -2.143032 | -0.555753 | -1.290501 |
| C | -1.531205 | -1.828872 | 1.122680  |
| C | -2.669129 | -0.066761 | -0.082542 |
| C | -2.354097 | -0.712793 | 1.125469  |
| H | -0.019356 | -4.034883 | -1.027119 |
| H | -0.160971 | -4.140089 | 0.792803  |
| H | -0.908594 | -2.039646 | -2.228645 |
| H | -2.394575 | -0.040505 | -2.211236 |
| H | -1.280540 | -2.319340 | 2.058681  |
| H | 1.138471  | -2.989691 | 0.035677  |
| O | 2.220524  | -2.504322 | 0.124717  |
| N | 2.072390  | -1.183510 | 0.093311  |
| C | 2.076074  | -0.428169 | -1.109674 |
| C | 1.916618  | -0.387062 | 1.259518  |
| O | 2.144916  | -0.886864 | -2.227275 |
| O | 1.838552  | -0.804902 | 2.392129  |
| C | 1.871015  | 1.010483  | 0.743245  |
| C | 1.754246  | 2.205072  | 1.439019  |
| C | 1.964544  | 0.986178  | -0.653882 |
| C | 1.733869  | 3.390441  | 0.692082  |
| C | 1.942330  | 2.155106  | -1.400756 |
| C | 1.826060  | 3.365916  | -0.705272 |
| H | 1.682750  | 2.211869  | 2.521761  |
| H | 1.644527  | 4.344437  | 1.202958  |
| H | 2.013069  | 2.123685  | -2.483072 |

|   |           |           |           |
|---|-----------|-----------|-----------|
| H | 1.805929  | 4.300971  | -1.256851 |
| H | -2.757928 | -0.332337 | 2.056648  |
| C | -3.543426 | 1.131940  | -0.137005 |
| O | -3.834647 | 1.733608  | -1.152719 |
| O | -4.003594 | 1.511062  | 1.082107  |
| H | -4.558566 | 2.292041  | 0.923024  |

Rotational constants (GHz): 0.3406100 0.2532100 0.1921100

Vibrational harmonic frequencies (cm<sup>-1</sup>):

|            |           |           |
|------------|-----------|-----------|
| -1698.7192 | 14.2207   | 15.2126   |
| 31.7069    | 47.9035   | 51.6947   |
| 77.9304    | 87.0123   | 138.3658  |
| 139.6414   | 179.6927  | 192.4751  |
| 239.9270   | 246.0177  | 311.7227  |
| 327.6145   | 338.5530  | 349.4112  |
| 367.2268   | 410.5601  | 414.0018  |
| 462.5894   | 472.0148  | 497.8331  |
| 502.2076   | 517.7988  | 523.5964  |
| 546.1577   | 600.1945  | 605.4302  |
| 609.5493   | 645.1654  | 676.4002  |
| 705.2466   | 712.6539  | 716.6799  |
| 720.2017   | 737.4121  | 781.6268  |
| 784.5934   | 796.3375  | 845.0321  |
| 848.0453   | 865.5150  | 892.0085  |
| 911.5842   | 975.5982  | 983.1119  |
| 995.1390   | 1000.7407 | 1009.9573 |
| 1015.6131  | 1028.0253 | 1047.9163 |
| 1085.3778  | 1093.6120 | 1119.1049 |
| 1127.6458  | 1134.0655 | 1153.6870 |
| 1185.9343  | 1189.3735 | 1193.5841 |
| 1222.0883  | 1234.3584 | 1274.1810 |
| 1312.8270  | 1339.4089 | 1361.2543 |
| 1384.0227  | 1396.2986 | 1402.5573 |
| 1457.9199  | 1476.8068 | 1502.4535 |
| 1507.1285  | 1509.4283 | 1541.8617 |
| 1588.6283  | 1640.2748 | 1655.0887 |
| 1661.3060  | 1814.4366 | 1823.8921 |
| 1862.4248  | 3113.0365 | 3194.6940 |
| 3198.1332  | 3199.1496 | 3201.8394 |
| 3207.5087  | 3219.1958 | 3222.4547 |
| 3225.6217  | 3230.7974 | 3770.2356 |

Zero-point correction (Hartree): 0.246148

*p*-(NO<sub>2</sub>-C<sub>6</sub>H<sub>4</sub>-CH<sub>3</sub>)

E(UB+HF-LYP/6-31G(d,p)) (Hartree): -1063.65552154

Electronic state : 2-A

Cartesian coordinates (Angs):

|   |           |           |           |
|---|-----------|-----------|-----------|
| C | -0.243048 | -3.492653 | -0.046729 |
| C | -1.079321 | -2.309029 | -0.040586 |
| C | -1.426740 | -1.657506 | -1.251316 |
| C | -2.194767 | -0.503520 | -1.248627 |
| C | -1.523715 | -1.738659 | 1.179217  |
| C | -2.620713 | 0.018984  | -0.024335 |
| C | -2.292911 | -0.585632 | 1.192367  |
| H | -0.196978 | -4.057604 | -0.977244 |
| H | -0.259004 | -4.110270 | 0.850756  |
| H | -1.075648 | -2.068060 | -2.193031 |
| H | -2.470036 | 0.001476  | -2.165944 |
| H | -1.249557 | -2.213105 | 2.116393  |
| H | 1.045015  | -3.018112 | 0.006563  |
| O | 2.130420  | -2.556514 | 0.044151  |
| N | 2.009230  | -1.233452 | 0.035005  |
| C | 1.980915  | -0.460890 | -1.158520 |
| C | 1.913574  | -0.449451 | 1.217954  |
| O | 1.992790  | -0.907461 | -2.282713 |
| O | 1.864700  | -0.884742 | 2.345301  |
| C | 1.876376  | 0.954536  | 0.721518  |
| C | 1.804874  | 2.141331  | 1.436851  |
| C | 1.916517  | 0.947755  | -0.678961 |
| C | 1.775460  | 3.336817  | 0.706664  |
| C | 1.885848  | 2.127368  | -1.408921 |
| C | 1.815326  | 3.329975  | -0.693439 |
| H | 1.772673  | 2.134989  | 2.521412  |
| H | 1.718624  | 4.284785  | 1.232872  |
| H | 1.915261  | 2.110256  | -2.493455 |
| H | 1.788791  | 4.272707  | -1.231329 |
| H | -2.642646 | -0.142897 | 2.116460  |
| N | -3.427545 | 1.244539  | -0.015512 |
| O | -3.694642 | 1.760556  | -1.101505 |
| O | -3.786310 | 1.684619  | 1.077424  |

Rotational constants (GHz): 0.3422100 0.2629800 0.1979500

Vibrational harmonic frequencies (cm<sup>-1</sup>):

|            |          |          |
|------------|----------|----------|
| -1704.4752 | 10.8673  | 13.5088  |
| 27.0984    | 47.5702  | 50.4132  |
| 70.3674    | 88.1597  | 137.2330 |
| 139.1231   | 180.5186 | 226.7884 |
| 240.4295   | 250.6326 | 311.9422 |
| 331.4504   | 341.0078 | 361.7370 |



|           |           |           |
|-----------|-----------|-----------|
| 376.9064  | 413.4585  | 414.2771  |
| 461.1735  | 473.0902  | 504.5690  |
| 510.8526  | 523.2585  | 534.6777  |
| 546.4726  | 600.7077  | 641.0904  |
| 642.9418  | 675.7556  | 698.6572  |
| 705.4212  | 716.4626  | 719.5319  |
| 764.0293  | 783.7680  | 796.9622  |
| 817.9639  | 838.9206  | 863.3922  |
| 872.6590  | 891.2342  | 913.0185  |
| 977.8005  | 984.6316  | 988.8683  |
| 998.8779  | 1012.2335 | 1015.2424 |
| 1024.0029 | 1048.0586 | 1086.8083 |
| 1092.1265 | 1115.2801 | 1125.7944 |
| 1127.9581 | 1144.4922 | 1186.8976 |
| 1194.0008 | 1206.6909 | 1234.6259 |
| 1270.7589 | 1313.2629 | 1331.3869 |
| 1372.6869 | 1378.6770 | 1397.1308 |
| 1403.2230 | 1455.4445 | 1476.6973 |
| 1502.0003 | 1505.2212 | 1507.3440 |
| 1529.5237 | 1593.3372 | 1628.4269 |
| 1654.2936 | 1656.9089 | 1660.1129 |
| 1825.1737 | 1863.1146 | 3117.3681 |
| 3197.0925 | 3205.1193 | 3206.7288 |
| 3207.8586 | 3209.3680 | 3220.2725 |
| 3223.6403 | 3249.0294 | 3249.3344 |

Zero-point correction (Hartree): 0.233524

*p*-(CH<sub>3</sub>-C<sub>6</sub>H<sub>4</sub>-CHO)

E(UB+HF-LYP/6-31G(d,p)) (Hartree): -972.493119112

Electronic state : 2-A

Cartesian coordinates (Angs):

|   |           |           |           |
|---|-----------|-----------|-----------|
| H | 0.557767  | 1.478040  | 0.635237  |
| O | -0.256612 | 1.152624  | 1.479176  |
| N | -1.312527 | 0.593279  | 0.877779  |
| C | -2.458954 | 1.324866  | 0.470323  |
| C | -1.422719 | -0.794559 | 0.652721  |
| C | -2.778885 | -0.972315 | 0.059797  |
| C | -3.391398 | 0.281711  | -0.050224 |
| C | -3.421301 | -2.130325 | -0.352750 |
| C | -4.667346 | 0.419155  | -0.575855 |
| C | -4.711974 | -2.000407 | -0.883890 |
| C | -5.324841 | -0.746264 | -0.993785 |
| O | -2.597809 | 2.523319  | 0.547016  |

|   |           |           |           |
|---|-----------|-----------|-----------|
| O | -0.566061 | -1.620704 | 0.895265  |
| H | -2.936240 | -3.096926 | -0.263455 |
| H | -5.131783 | 1.396560  | -0.656701 |
| H | -5.246418 | -2.885410 | -1.216006 |
| H | -6.325455 | -0.677186 | -1.409903 |
| C | 2.664203  | 0.816704  | -0.199816 |
| C | 2.567549  | -0.352754 | 0.567435  |
| C | 3.633654  | -1.249674 | 0.584037  |
| C | 3.830980  | 1.080190  | -0.944271 |
| C | 4.804346  | -0.998777 | -0.143543 |
| C | 4.884393  | 0.180128  | -0.909677 |
| C | 1.545805  | 1.773679  | -0.235743 |
| O | 1.448836  | 2.765430  | -0.907071 |
| H | 1.658651  | -0.565962 | 1.121744  |
| H | 3.553995  | -2.160425 | 1.170736  |
| H | 3.887645  | 1.988410  | -1.535861 |
| H | 5.785337  | 0.383665  | -1.483027 |
| C | 5.966996  | -1.958899 | -0.102803 |
| H | 6.348819  | -2.163972 | -1.108455 |
| H | 6.798468  | -1.540028 | 0.477087  |
| H | 5.687034  | -2.909828 | 0.357319  |

Rotational constants (GHz): 0.6443700 0.1457400 0.1281700

Vibrational harmonic frequencies (cm<sup>-1</sup>):

|            |           |           |
|------------|-----------|-----------|
| -1518.3695 | 13.1011   | 27.1857   |
| 31.7807    | 38.0792   | 65.0131   |
| 72.8539    | 97.4213   | 106.8814  |
| 140.7208   | 162.1899  | 209.9894  |
| 233.5770   | 241.4644  | 253.4764  |
| 324.1291   | 338.5203  | 344.3803  |
| 371.3256   | 412.3580  | 418.1767  |
| 420.4055   | 465.1851  | 476.4445  |
| 486.2604   | 524.0947  | 551.7486  |
| 601.4016   | 626.1223  | 652.6163  |
| 676.5275   | 702.3480  | 716.4065  |
| 718.5186   | 722.4217  | 778.5082  |
| 784.5734   | 794.6612  | 837.4978  |
| 864.5228   | 867.3162  | 893.3016  |
| 910.5206   | 973.6204  | 984.9330  |
| 999.9540   | 1008.3625 | 1013.1532 |
| 1014.2963  | 1037.5516 | 1046.6382 |
| 1064.1029  | 1096.3985 | 1138.1601 |
| 1148.0304  | 1182.2769 | 1185.2066 |
| 1192.4607  | 1218.1733 | 1229.5685 |
| 1232.6640  | 1239.2293 | 1312.3198 |
| 1346.0129  | 1357.9558 | 1380.6126 |
| 1403.0111  | 1425.2692 | 1448.4760 |

|           |           |           |
|-----------|-----------|-----------|
| 1453.7934 | 1497.3722 | 1502.4712 |
| 1503.4918 | 1506.1760 | 1542.2258 |
| 1615.5608 | 1655.2246 | 1656.3129 |
| 1661.7370 | 1811.7968 | 1842.8993 |
| 1861.7494 | 3044.1063 | 3102.1037 |
| 3135.8172 | 3182.9079 | 3193.4092 |
| 3194.1860 | 3206.3834 | 3214.1976 |
| 3214.8330 | 3218.0833 | 3221.4082 |

Zero-point correction (Hartree): 0.240781

*p*-(H-C<sub>6</sub>H<sub>4</sub>-CHO)

E(UB+HF-LYP/6-31G(d,p)) (Hartree): -933.171888473

Electronic state : 2-A

Cartesian coordinates (Angs):

|   |           |           |           |
|---|-----------|-----------|-----------|
| H | 1.027253  | 1.243661  | 0.633982  |
| O | 0.196121  | 0.985499  | 1.478736  |
| N | -0.912911 | 0.537752  | 0.879956  |
| C | -1.991536 | 1.379310  | 0.500153  |
| C | -1.149970 | -0.829337 | 0.626129  |
| C | -2.522348 | -0.870489 | 0.045678  |
| C | -3.019520 | 0.436125  | -0.030639 |
| C | -3.271484 | -1.956083 | -0.383780 |
| C | -4.282691 | 0.700192  | -0.538299 |
| C | -4.550000 | -1.697972 | -0.897102 |
| C | -5.047358 | -0.391288 | -0.973147 |
| O | -2.019466 | 2.583427  | 0.602772  |
| O | -0.367814 | -1.733332 | 0.840498  |
| H | -2.875564 | -2.964431 | -0.320239 |
| H | -4.657199 | 1.717188  | -0.593143 |
| H | -5.165845 | -2.523325 | -1.241546 |
| H | -6.041541 | -0.222523 | -1.375950 |
| C | 3.075835  | 0.417133  | -0.215913 |
| C | 2.880287  | -0.745592 | 0.544388  |
| C | 3.873514  | -1.724395 | 0.558741  |
| C | 4.259208  | 0.602898  | -0.955726 |
| C | 5.050595  | -1.538841 | -0.169092 |
| C | 5.244390  | -0.376155 | -0.926155 |
| C | 2.032150  | 1.461095  | -0.245173 |
| O | 2.011979  | 2.456107  | -0.916752 |
| H | 1.954482  | -0.885602 | 1.093823  |
| H | 3.727243  | -2.630781 | 1.137745  |
| H | 4.383301  | 1.511535  | -1.536045 |

|   |          |           |           |
|---|----------|-----------|-----------|
| H | 5.822936 | -2.302632 | -0.150425 |
| H | 6.162317 | -0.240566 | -1.490296 |

Rotational constants (GHz): 0.7290700 0.1713500 0.1513700

Vibrational harmonic frequencies (cm<sup>-1</sup>):

|            |           |           |
|------------|-----------|-----------|
| -1529.4470 | 16.9316   | 28.3790   |
| 38.9172    | 63.1424   | 79.9652   |
| 102.4932   | 140.4624  | 143.8780  |
| 165.0521   | 234.7309  | 236.6504  |
| 242.0283   | 324.9573  | 332.7083  |
| 350.8785   | 412.3439  | 417.7695  |
| 437.5225   | 451.6620  | 465.0846  |
| 486.9289   | 524.1024  | 551.7486  |
| 601.7240   | 625.6470  | 676.1507  |
| 681.0553   | 701.2545  | 702.7993  |
| 716.4494   | 719.7933  | 777.1324  |
| 780.0856   | 794.8988  | 851.9294  |
| 869.6506   | 893.1046  | 910.9524  |
| 963.8802   | 974.2075  | 995.5626  |
| 1008.7449  | 1014.1564 | 1014.6086 |
| 1019.7204  | 1046.6573 | 1051.8891 |
| 1096.2515  | 1114.6900 | 1138.0008 |
| 1177.9548  | 1185.1901 | 1190.8278 |
| 1192.4919  | 1214.6689 | 1226.5710 |
| 1230.3313  | 1312.4415 | 1350.2676 |
| 1371.0872  | 1382.3575 | 1403.1445 |
| 1452.7023  | 1490.2657 | 1502.4152 |
| 1506.5283  | 1526.8090 | 1631.0431 |
| 1646.0132  | 1656.2289 | 1661.6662 |
| 1812.2908  | 1847.0918 | 1863.0921 |
| 3188.9306  | 3193.6984 | 3201.6065 |
| 3206.6836  | 3209.7000 | 3217.8173 |
| 3218.5194  | 3219.7820 | 3221.7721 |

Zero-point correction (Hartree): 0.213467

*p*-(C(O)OH-C<sub>6</sub>H<sub>4</sub>-CHO)

E(UB+HF-LYP/6-31G(d,p)) (Hartree): -1121.74297168

Electronic state : 2-A

Cartesian coordinates (Angs):

|   |           |          |          |
|---|-----------|----------|----------|
| H | -0.182836 | 1.647950 | 0.684028 |
| O | -0.953106 | 1.227256 | 1.508018 |
| N | -1.950649 | 0.586396 | 0.889011 |
| C | -3.166402 | 1.213309 | 0.505305 |

|   |           |           |           |
|---|-----------|-----------|-----------|
| C | -1.919979 | -0.797058 | 0.615191  |
| C | -3.253398 | -1.090253 | 0.018037  |
| C | -3.989745 | 0.098952  | -0.049346 |
| C | -3.776682 | -2.292396 | -0.434957 |
| C | -5.274307 | 0.124904  | -0.571394 |
| C | -5.075034 | -2.274924 | -0.962683 |
| C | -5.811530 | -1.085880 | -1.030002 |
| O | -3.422172 | 2.388753  | 0.621166  |
| O | -0.980145 | -1.536608 | 0.826552  |
| H | -3.196428 | -3.207627 | -0.378814 |
| H | -5.835141 | 1.052605  | -0.619238 |
| H | -5.518283 | -3.197227 | -1.325900 |
| H | -6.814910 | -1.103848 | -1.444693 |
| C | 2.000647  | 1.225732  | -0.163874 |
| C | 2.016972  | 0.033494  | 0.573444  |
| C | 3.172415  | -0.745759 | 0.585738  |
| C | 3.134881  | 1.643636  | -0.885867 |
| C | 4.304458  | -0.329528 | -0.126112 |
| C | 4.282978  | 0.866904  | -0.861918 |
| C | 0.777096  | 2.060371  | -0.188112 |
| O | 0.583732  | 3.041352  | -0.850658 |
| H | 1.128821  | -0.288757 | 1.108017  |
| H | 3.198452  | -1.673969 | 1.144002  |
| H | 3.094193  | 2.570239  | -1.448875 |
| H | 5.175500  | 1.160508  | -1.403697 |
| C | 5.567734  | -1.124440 | -0.140921 |
| O | 6.571988  | -0.806175 | -0.744520 |
| O | 5.488526  | -2.256612 | 0.595766  |
| H | 6.353967  | -2.690764 | 0.516318  |

Rotational constants (GHz): 0.5482200 0.1078300 0.0958400

Vibrational harmonic frequencies (cm<sup>-1</sup>):

|            |          |          |
|------------|----------|----------|
| -1558.9316 | 10.8607  | 24.3672  |
| 33.5575    | 48.6427  | 63.3375  |
| 74.4120    | 81.4631  | 102.2081 |
| 140.9090   | 159.3167 | 167.3115 |
| 213.4320   | 237.1188 | 242.4302 |
| 252.5504   | 320.4385 | 336.6179 |
| 346.6741   | 357.6985 | 412.5925 |
| 418.7786   | 448.6265 | 464.9099 |
| 475.8172   | 494.4245 | 524.3069 |
| 535.9545   | 551.4788 | 601.5875 |
| 611.1481   | 639.8277 | 666.2438 |
| 676.4053   | 703.1291 | 712.5927 |
| 716.4550   | 719.5688 | 764.6160 |
| 780.5658   | 782.2046 | 795.4923 |
| 862.4947   | 873.6681 | 888.3853 |

|           |           |           |
|-----------|-----------|-----------|
| 893.8085  | 911.2197  | 974.9026  |
| 1004.9105 | 1009.4894 | 1009.7044 |
| 1014.3098 | 1036.6873 | 1046.9070 |
| 1096.1484 | 1122.0955 | 1137.3519 |
| 1138.6433 | 1174.6328 | 1185.7038 |
| 1192.7417 | 1200.1877 | 1217.2960 |
| 1222.7624 | 1230.7314 | 1312.7399 |
| 1339.7340 | 1364.7474 | 1383.5462 |
| 1393.9293 | 1403.4889 | 1448.9127 |
| 1457.6640 | 1502.4629 | 1506.8306 |
| 1536.6806 | 1615.7611 | 1655.7913 |
| 1657.8912 | 1661.7441 | 1812.7760 |
| 1824.6179 | 1850.7238 | 1865.0627 |
| 3194.5700 | 3207.3714 | 3213.6412 |
| 3214.9729 | 3218.9787 | 3222.2937 |
| 3228.6280 | 3237.4285 | 3767.7291 |

Zero-point correction (Hartree): 0.228399

*p*-(NO<sub>2</sub>-C<sub>6</sub>H<sub>4</sub>-CHO)

E(UB+HF-LYP/6-31G(d,p)) (Hartree): -1137.66309363

Electronic state : 2-A

Cartesian coordinates (Angs):

|   |           |           |           |
|---|-----------|-----------|-----------|
| H | -0.163551 | 1.654553  | 0.666816  |
| O | -0.931575 | 1.248109  | 1.485002  |
| N | -1.932635 | 0.606861  | 0.872114  |
| C | -3.149865 | 1.234442  | 0.489871  |
| C | -1.906472 | -0.778717 | 0.608538  |
| C | -3.243856 | -1.073662 | 0.023180  |
| C | -3.978256 | 0.116867  | -0.049491 |
| C | -3.772357 | -2.278552 | -0.416518 |
| C | -5.266047 | 0.141089  | -0.563693 |
| C | -5.074020 | -2.262550 | -0.935907 |
| C | -5.808473 | -1.072491 | -1.008501 |
| O | -3.399564 | 2.411646  | 0.596688  |
| O | -0.964320 | -1.516236 | 0.817929  |
| H | -3.193905 | -3.194637 | -0.356428 |
| H | -5.825509 | 1.069352  | -0.615894 |
| H | -5.521544 | -3.186902 | -1.288339 |
| H | -6.814526 | -1.091912 | -1.416471 |
| C | 2.030266  | 1.192892  | -0.165243 |
| C | 2.014486  | -0.003841 | 0.565209  |
| C | 3.155172  | -0.804376 | 0.591403  |
| C | 3.180318  | 1.598772  | -0.867486 |
| C | 4.283551  | -0.380910 | -0.105135 |

|   |          |           |           |
|---|----------|-----------|-----------|
| C | 4.320636 | 0.808215  | -0.836511 |
| C | 0.818263 | 2.050257  | -0.203364 |
| O | 0.656915 | 3.032375  | -0.871069 |
| H | 1.113726 | -0.316950 | 1.084156  |
| H | 3.181532 | -1.739463 | 1.136120  |
| H | 3.162347 | 2.529265  | -1.424803 |
| H | 5.227057 | 1.085169  | -1.359882 |
| N | 5.496504 | -1.226856 | -0.073852 |
| O | 5.444796 | -2.267867 | 0.576196  |
| O | 6.477149 | -0.832166 | -0.701149 |

Rotational constants (GHz): 0.5545500 0.1084300 0.0962600

Vibrational harmonic frequencies (cm<sup>-1</sup>):

|            |           |           |
|------------|-----------|-----------|
| -1583.1794 | 11.0560   | 24.1192   |
| 34.6233    | 45.6567   | 63.5999   |
| 72.4791    | 80.9235   | 103.4808  |
| 141.0725   | 159.2495  | 179.7076  |
| 220.4314   | 237.8628  | 243.2514  |
| 278.2825   | 321.2550  | 337.3015  |
| 353.9233   | 359.5492  | 412.4497  |
| 422.6803   | 457.8044  | 464.7003  |
| 482.1036   | 519.9579  | 524.2415  |
| 540.1110   | 556.5383  | 601.4715  |
| 636.1614   | 676.1785  | 695.2158  |
| 703.5179   | 712.1269  | 716.6094  |
| 720.9088   | 762.7227  | 780.2709  |
| 796.0880   | 832.4152  | 863.3850  |
| 880.8224   | 891.1953  | 896.0166  |
| 911.8042   | 975.9568  | 999.1734  |
| 1010.9695  | 1012.1329 | 1015.2509 |
| 1032.8118  | 1046.9984 | 1095.8913 |
| 1122.6218  | 1130.9332 | 1136.5100 |
| 1169.0894  | 1186.2022 | 1193.0359 |
| 1208.1804  | 1211.5939 | 1230.8008 |
| 1313.1248  | 1330.9330 | 1374.3385 |
| 1384.8066  | 1401.5150 | 1404.3296 |
| 1445.6700  | 1460.2928 | 1502.3083 |
| 1506.9841  | 1523.4439 | 1619.5918 |
| 1644.8743  | 1655.4296 | 1661.3014 |
| 1675.0560  | 1812.6814 | 1853.9119 |
| 1867.6764  | 3195.6857 | 3208.2900 |
| 3213.8499  | 3219.6532 | 3221.2494 |
| 3222.9543  | 3250.0669 | 3253.0329 |

Zero-point correction (Hartree): 0.215803

*p*-(CH<sub>3</sub>O-C<sub>6</sub>H<sub>4</sub>-CH<sub>2</sub>OH)

E(UB+HF-LYP/6-31G(d,p)) (Hartree): -1048.90371509

Electronic state : 2-A

Cartesian coordinates (Angs):

|   |           |           |           |
|---|-----------|-----------|-----------|
| C | 1.279567  | -2.819563 | 0.071316  |
| C | 1.839376  | -1.457314 | -0.091004 |
| C | 2.395319  | -0.794145 | 1.017465  |
| C | 2.912420  | 0.493529  | 0.911267  |
| C | 1.805975  | -0.776123 | -1.324649 |
| C | 2.875386  | 1.153491  | -0.327069 |
| C | 2.318911  | 0.505419  | -1.443589 |
| H | 1.896093  | -3.485045 | 0.685044  |
| H | 2.419292  | -1.295037 | 1.982220  |
| H | 3.336340  | 0.971283  | 1.786311  |
| H | 1.392914  | -1.277041 | -2.193305 |
| H | 2.312421  | 1.029945  | -2.393539 |
| H | 0.229972  | -2.652648 | 0.795961  |
| O | -1.003417 | -2.540173 | 1.171700  |
| N | -1.438689 | -1.359380 | 0.740325  |
| C | -1.705041 | -0.253378 | 1.598116  |
| C | -1.702710 | -1.081694 | -0.607838 |
| O | -1.507290 | -0.221937 | 2.789517  |
| O | -1.454276 | -1.822512 | -1.548575 |
| C | -2.271428 | 0.292354  | -0.620565 |
| C | -2.734348 | 1.054552  | -1.682527 |
| C | -2.270408 | 0.787023  | 0.689595  |
| C | -3.211164 | 2.341542  | -1.395448 |
| C | -2.734737 | 2.060019  | 0.980739  |
| C | -3.211034 | 2.836072  | -0.086070 |
| H | -2.726990 | 0.662209  | -2.694128 |
| H | -3.585786 | 2.965906  | -2.200929 |
| H | -2.726833 | 2.434492  | 1.999194  |
| H | -3.584761 | 3.837529  | 0.104995  |
| O | 0.825188  | -3.488646 | -1.046349 |
| H | 0.020586  | -3.035862 | -1.371630 |
| O | 3.350583  | 2.408572  | -0.548901 |
| C | 3.935241  | 3.114030  | 0.537064  |
| H | 4.812978  | 2.588446  | 0.933374  |
| H | 4.245565  | 4.079512  | 0.135353  |
| H | 3.214767  | 3.274652  | 1.348855  |

Rotational constants (GHz): 0.3293900 0.2396900 0.1831700

Vibrational harmonic frequencies (cm<sup>-1</sup>):

|            |          |          |
|------------|----------|----------|
| -1385.6558 | 11.9580  | 27.3194  |
| 36.3391    | 54.5750  | 80.0456  |
| 84.1593    | 126.0045 | 144.2819 |



|           |           |           |
|-----------|-----------|-----------|
| 165.7241  | 170.4214  | 186.1699  |
| 201.7823  | 239.1703  | 249.6765  |
| 258.0435  | 303.9216  | 317.5306  |
| 349.4323  | 383.0967  | 407.0362  |
| 416.0146  | 420.9884  | 464.5882  |
| 469.4618  | 480.2828  | 524.8036  |
| 531.1370  | 569.0254  | 593.6576  |
| 614.7241  | 625.2349  | 649.6724  |
| 675.7505  | 701.6265  | 717.1202  |
| 718.6440  | 724.7129  | 760.9887  |
| 777.8993  | 794.0041  | 822.3959  |
| 842.1055  | 854.5621  | 895.5567  |
| 910.6605  | 947.6591  | 966.0233  |
| 973.2551  | 1008.4427 | 1010.3086 |
| 1021.8686 | 1035.5043 | 1053.5669 |
| 1072.5340 | 1096.9065 | 1136.9165 |
| 1138.5676 | 1161.0204 | 1176.3546 |
| 1185.8610 | 1192.8274 | 1193.9857 |
| 1210.7771 | 1230.4584 | 1231.6172 |
| 1269.6341 | 1305.7751 | 1313.2885 |
| 1323.3888 | 1344.7472 | 1377.1493 |
| 1401.3670 | 1409.5731 | 1449.9065 |
| 1462.7959 | 1473.1117 | 1487.9420 |
| 1502.4130 | 1504.2817 | 1506.6069 |
| 1516.7241 | 1551.0612 | 1610.7216 |
| 1652.6132 | 1657.2438 | 1661.0628 |
| 1776.4601 | 1856.4640 | 3022.6973 |
| 3086.6765 | 3087.9537 | 3155.4605 |
| 3183.3162 | 3194.5596 | 3207.4597 |
| 3208.2879 | 3219.1007 | 3222.4490 |
| 3223.3807 | 3228.8773 | 3579.2516 |

Zero-point correction (Hartree): 0.269805

*p*-(CH<sub>3</sub>-C<sub>6</sub>H<sub>4</sub>-CH<sub>2</sub>OH)

E(UB+HF-LYP/6-31G(d,p)) (Hartree): -973.699215321

Electronic state : 2-A

Cartesian coordinates (Angs):

|   |          |           |           |
|---|----------|-----------|-----------|
| C | 2.281175 | -2.029229 | -0.026851 |
| C | 2.356638 | -0.546196 | -0.029497 |
| C | 2.568552 | 0.142495  | 1.180877  |
| C | 2.630722 | 1.529976  | 1.205832  |
| C | 2.195853 | 0.204437  | -1.205697 |
| C | 2.481163 | 2.284717  | 0.029959  |
| C | 2.261546 | 1.595018  | -1.170803 |

|   |           |           |           |
|---|-----------|-----------|-----------|
| H | 3.063614  | -2.514895 | 0.565753  |
| H | 2.675981  | -0.419971 | 2.105274  |
| H | 2.795459  | 2.041159  | 2.151116  |
| H | 2.041355  | -0.312518 | -2.146643 |
| H | 2.146949  | 2.157450  | -2.094317 |
| H | 1.208993  | -2.293456 | 0.637506  |
| O | -0.001125 | -2.622968 | 0.932614  |
| N | -0.785352 | -1.607761 | 0.581288  |
| C | -1.438848 | -0.753188 | 1.517117  |
| C | -1.075817 | -1.283906 | -0.751580 |
| O | -1.309512 | -0.794430 | 2.717090  |
| O | -0.559451 | -1.792834 | -1.736038 |
| C | -2.069847 | -0.180712 | -0.677558 |
| C | -2.721476 | 0.499277  | -1.695519 |
| C | -2.283424 | 0.138402  | 0.669346  |
| C | -3.611687 | 1.517573  | -1.326226 |
| C | -3.157207 | 1.147697  | 1.042233  |
| C | -3.825539 | 1.836806  | 0.019798  |
| H | -2.546300 | 0.245058  | -2.735717 |
| H | -4.143983 | 2.068602  | -2.095655 |
| H | -3.312659 | 1.389067  | 2.088672  |
| H | -4.519659 | 2.631969  | 0.274664  |
| O | 2.114844  | -2.688804 | -1.224596 |
| H | 1.228049  | -2.468994 | -1.577015 |
| C | 2.583198  | 3.790200  | 0.058894  |
| H | 2.133037  | 4.205123  | 0.966305  |
| H | 3.631259  | 4.115379  | 0.041355  |
| H | 2.087313  | 4.242430  | -0.804831 |

Rotational constants (GHz): 0.3864500 0.2639300 0.2139700

Vibrational harmonic frequencies (cm<sup>-1</sup>):

|            |          |           |
|------------|----------|-----------|
| -1436.1242 | 14.6920  | 28.4104   |
| 39.3050    | 46.0736  | 61.5258   |
| 83.0272    | 108.4778 | 142.1747  |
| 161.9916   | 172.2367 | 200.4575  |
| 202.4706   | 250.3650 | 279.5754  |
| 315.8492   | 339.1917 | 349.4984  |
| 379.3749   | 409.2010 | 412.9440  |
| 414.5493   | 464.7899 | 474.8400  |
| 510.3700   | 524.7959 | 561.0542  |
| 586.6007   | 620.9340 | 631.7661  |
| 651.9759   | 675.9155 | 701.9242  |
| 715.1891   | 717.3081 | 722.9682  |
| 764.9459   | 778.4594 | 794.3209  |
| 819.8591   | 851.1390 | 852.5153  |
| 895.1387   | 910.7505 | 963.0682  |
| 972.1846   | 973.7339 | 1008.8752 |

|           |           |           |
|-----------|-----------|-----------|
| 1010.7392 | 1011.7325 | 1030.6820 |
| 1037.2430 | 1053.4371 | 1062.9971 |
| 1096.7179 | 1137.3077 | 1143.0171 |
| 1164.3921 | 1186.1402 | 1193.2457 |
| 1201.8916 | 1230.6965 | 1232.0183 |
| 1240.4397 | 1267.3243 | 1313.3967 |
| 1324.7226 | 1344.7099 | 1369.5509 |
| 1401.0814 | 1409.2072 | 1426.4812 |
| 1447.6338 | 1457.2410 | 1468.9722 |
| 1499.9709 | 1502.4410 | 1505.0927 |
| 1506.5625 | 1547.1146 | 1610.3826 |
| 1654.4160 | 1656.8581 | 1661.0967 |
| 1778.4628 | 1858.4955 | 3038.4340 |
| 3091.6615 | 3097.8639 | 3127.3712 |
| 3175.3871 | 3179.7171 | 3191.7612 |
| 3194.6958 | 3207.5802 | 3217.9436 |
| 3219.3332 | 3222.5114 | 3573.4054 |

Zero-point correction (Hartree): 0.264583

*p*-(H-C<sub>6</sub>H<sub>4</sub>-CH<sub>2</sub>OH)

E(UB+HF-LYP/6-31G(d,p)) (Hartree): -934.378817866

Electronic state : 2-A

Cartesian coordinates (Angs):

|   |           |           |           |
|---|-----------|-----------|-----------|
| C | 2.761482  | -1.238442 | -0.046933 |
| C | 2.509661  | 0.226534  | -0.020168 |
| C | 2.563695  | 0.913353  | 1.208448  |
| C | 2.320575  | 2.281997  | 1.264836  |
| C | 2.195989  | 0.944630  | -1.186968 |
| C | 2.013960  | 2.989040  | 0.097060  |
| C | 1.954748  | 2.315895  | -1.125973 |
| H | 3.631582  | -1.552186 | 0.539103  |
| H | 2.792244  | 0.363920  | 2.118448  |
| H | 2.368128  | 2.799918  | 2.218296  |
| H | 2.167248  | 0.422632  | -2.137304 |
| H | 1.825703  | 4.057775  | 0.141241  |
| H | 1.727288  | 2.862946  | -2.036576 |
| H | 1.769925  | -1.740116 | 0.609697  |
| O | 0.660469  | -2.320317 | 0.896606  |
| N | -0.321981 | -1.489990 | 0.558592  |
| C | -1.144876 | -0.811203 | 1.505377  |
| C | -0.675704 | -1.216552 | -0.770488 |
| O | -1.009662 | -0.842911 | 2.704799  |
| O | -0.059665 | -1.585424 | -1.760014 |

|                                          |           |           |           |
|------------------------------------------|-----------|-----------|-----------|
| C                                        | -1.884253 | -0.355527 | -0.683189 |
| C                                        | -2.666605 | 0.184072  | -1.693157 |
| C                                        | -2.161214 | -0.109810 | 0.667708  |
| C                                        | -3.754427 | 0.982154  | -1.311881 |
| C                                        | -3.231075 | 0.683147  | 1.052405  |
| C                                        | -4.031535 | 1.228165  | 0.038024  |
| H                                        | -2.441017 | -0.010782 | -2.736462 |
| H                                        | -4.392449 | 1.417714  | -2.074868 |
| H                                        | -3.434667 | 0.870266  | 2.101686  |
| H                                        | -4.879744 | 1.852418  | 0.302329  |
| O                                        | 2.742224  | -1.895858 | -1.255783 |
| H                                        | 1.830172  | -1.863215 | -1.611203 |
| Rotational constants (GHz):              | 0.4857400 | 0.2749400 | 0.2502400 |
| Vibrational harmonic frequencies (cm-1): |           |           |           |
| -1465.4028                               | 14.8565   | 27.6082   |           |
| 38.2196                                  | 69.9281   | 86.8308   |           |
| 129.9814                                 | 148.5687  | 172.2197  |           |
| 184.3458                                 | 214.0084  | 223.2600  |           |
| 251.7921                                 | 315.2479  | 348.4238  |           |
| 360.2178                                 | 411.0128  | 413.2915  |           |
| 425.4074                                 | 464.7971  | 473.2363  |           |
| 495.7088                                 | 524.7169  | 569.8690  |           |
| 609.3536                                 | 626.4443  | 629.2864  |           |
| 651.5364                                 | 675.9706  | 700.6058  |           |
| 701.8982                                 | 717.4132  | 721.6177  |           |
| 758.6584                                 | 778.6411  | 794.4491  |           |
| 828.2287                                 | 853.0613  | 895.0090  |           |
| 911.0398                                 | 916.5333  | 974.1699  |           |
| 974.2271                                 | 998.1099  | 1007.9582 |           |
| 1009.4664                                | 1014.8466 | 1034.6210 |           |
| 1051.2692                                | 1053.3155 | 1096.6119 |           |
| 1106.9619                                | 1137.0004 | 1164.7377 |           |
| 1186.0914                                | 1186.3945 | 1193.3346 |           |
| 1199.1757                                | 1225.2626 | 1232.2048 |           |
| 1260.2760                                | 1313.6528 | 1322.1541 |           |
| 1362.7382                                | 1369.6387 | 1400.3213 |           |
| 1408.4698                                | 1454.8840 | 1459.4738 |           |
| 1492.7215                                | 1501.9344 | 1506.5556 |           |
| 1529.3769                                | 1625.5547 | 1645.0273 |           |
| 1656.5259                                | 1660.6694 | 1778.7929 |           |
| 1859.3303                                | 3093.5279 | 3179.6359 |           |
| 3186.5766                                | 3194.9497 | 3197.3256 |           |
| 3207.7670                                | 3209.0508 | 3218.4402 |           |
| 3219.3615                                | 3222.5709 | 3574.3993 |           |
| Zero-point correction (Hartree):         | 0.237136  |           |           |

*p*-(NO<sub>2</sub>-C<sub>6</sub>H<sub>4</sub>-CH<sub>2</sub>OH)

E(UB+HF-LYP/6-31G(d,p)) (Hartree): -1138.87465113

Electronic state : 2-A

Cartesian coordinates (Angs):

|   |           |           |           |
|---|-----------|-----------|-----------|
| C | -0.674821 | 3.098412  | -0.038710 |
| C | -1.450385 | 1.831441  | -0.049493 |
| C | -1.975470 | 1.332294  | 1.160301  |
| C | -2.682286 | 0.138366  | 1.189692  |
| C | -1.649057 | 1.099980  | -1.235006 |
| C | -2.860400 | -0.563882 | -0.004311 |
| C | -2.355890 | -0.096782 | -1.217720 |
| H | -1.135521 | 3.897446  | 0.550673  |
| H | -1.817515 | 1.885031  | 2.082329  |
| H | -3.092922 | -0.260528 | 2.108639  |
| H | -1.261541 | 1.488588  | -2.169745 |
| H | -2.529123 | -0.669760 | -2.120111 |
| H | 0.389595  | 2.802807  | 0.645816  |
| O | 1.588547  | 2.506537  | 0.945185  |
| N | 1.796486  | 1.241786  | 0.595069  |
| C | 1.960908  | 0.175350  | 1.533414  |
| C | 1.910578  | 0.820641  | -0.739141 |
| O | 1.851796  | 0.275325  | 2.730776  |
| O | 1.694281  | 1.516884  | -1.720722 |
| C | 2.264066  | -0.619504 | -0.663297 |
| C | 2.519301  | -1.526641 | -1.681276 |
| C | 2.288750  | -1.005012 | 0.684108  |
| C | 2.811733  | -2.846861 | -1.311759 |
| C | 2.571018  | -2.310203 | 1.056511  |
| C | 2.836395  | -3.232263 | 0.033938  |
| H | 2.493984  | -1.219052 | -2.721430 |
| H | 3.020156  | -3.584209 | -2.080830 |
| H | 2.582344  | -2.599670 | 2.102131  |
| H | 3.062002  | -4.263326 | 0.288229  |
| O | -0.192553 | 3.593141  | -1.225069 |
| H | 0.484461  | 2.973708  | -1.570950 |
| N | -3.600548 | -1.832466 | 0.018671  |
| O | -4.043626 | -2.215451 | 1.101522  |
| O | -3.730211 | -2.437473 | -1.045997 |

Rotational constants (GHz): 0.3034400 0.2198200 0.1668000

Vibrational harmonic frequencies (cm<sup>-1</sup>):

|            |          |          |
|------------|----------|----------|
| -1602.1916 | 12.4498  | 27.5804  |
| 36.8871    | 54.3327  | 70.4165  |
| 84.1421    | 96.9333  | 140.0929 |
| 159.6160   | 170.5607 | 180.1575 |

|           |           |           |
|-----------|-----------|-----------|
| 200.8113  | 251.3369  | 261.7606  |
| 274.0824  | 311.7648  | 342.0200  |
| 352.1379  | 379.6844  | 413.2699  |
| 419.7102  | 463.3039  | 472.9373  |
| 495.5649  | 504.7890  | 524.4613  |
| 539.2350  | 570.7440  | 614.3587  |
| 638.0656  | 654.6724  | 675.5260  |
| 689.9770  | 697.9175  | 704.3373  |
| 717.5324  | 721.9161  | 757.6381  |
| 778.7003  | 795.9788  | 818.5481  |
| 850.4491  | 861.0864  | 875.6219  |
| 894.0552  | 912.8111  | 977.3905  |
| 988.5619  | 990.5309  | 1009.3563 |
| 1012.8810 | 1025.6801 | 1033.1519 |
| 1052.2979 | 1095.4713 | 1127.4211 |
| 1131.3743 | 1132.9697 | 1168.9502 |
| 1187.6635 | 1194.3501 | 1202.3189 |
| 1226.4015 | 1233.6481 | 1262.6190 |
| 1314.6096 | 1317.5446 | 1345.3850 |
| 1383.3962 | 1389.9932 | 1402.0033 |
| 1408.3924 | 1446.9785 | 1457.8134 |
| 1468.9315 | 1501.9262 | 1506.7745 |
| 1526.4835 | 1608.2292 | 1640.7682 |
| 1655.3820 | 1659.2897 | 1664.5800 |
| 1778.9725 | 1862.5967 | 3100.9106 |
| 3195.3752 | 3198.0181 | 3210.1958 |
| 3220.9307 | 3224.2519 | 3224.6161 |
| 3247.5361 | 3249.1544 | 3549.8311 |

Zero-point correction (Hartree): 0.239854
